# Supplementary material for: Recombinant Phytase Modulates Blood Amino Acids and Proteomics Profiles in Pigs Fed with Low-Protein, -Calcium, and -Phosphorous Diets
Source: MDPI journal article supplement (doi:10.3390/ijms25010341), 2023-12-26
Supplement: s1 [file s1]

## Supplementary Material

### Supplementary Tables

**Table S1.** Paired-wise comparison of proteins identified with significantly differential abundance in serum of nursery pigs fed with low protein diets with or without reduced calcium and phosphorous supplemented with a corn-expressed phytase.

| Protein ID                  | Protein description                       | Molecular function                           | Biological process                              | Gene name | P-value | Fold change |
|-----------------------------|-------------------------------------------|----------------------------------------------|-------------------------------------------------|-----------|---------|-------------|
| <b>NC vs PC<sup>1</sup></b> |                                           |                                              |                                                 |           |         |             |
| T1UNN8                      | Angiopoietin like 8                       | structural constituent of cytoskeleton       | cell adhesion                                   | ANGPTL8   | 0.001   | 17.97       |
| F6Q5X1                      | Serum amyloid A protein                   | Apolipoprotein of the HDL complex.           | acute-phase response                            | SAA2      | 0.028   | 3.97        |
| A0A287B0B8                  | Pulmonary surfactant-associated protein B | -                                            | lipid metabolic process                         | SFTP8     | 0.003   | 2.91        |
| A0A5K1TWC1                  | Apolipoprotein D                          | lipid binding                                | lipid transport                                 | APOD      | 0.001   | 2.63        |
| A0A5G2R684                  | Uncharacterized protein                   | -                                            | -                                               | MARCOL    | 0.018   | 2.54        |
| Q28989                      | Ameloblastin                              | growth factor activity                       | biomineral tissue development                   | AMBN      | 0.033   | 2.52        |
| A0A287ALJ6                  | Ig-like domain-containing protein         | -                                            | immune response                                 | IGKV2D-29 | 0.011   | 2.37        |
| I3LM99                      | Uncharacterized protein                   | -                                            | -                                               | GCA       | 0.000   | 2.24        |
| A0A287AJ94                  | Microsemino protein, prostate associated  | calcium ion binding                          | protein heterodimerization                      | MSMP      | 0.025   | 2.14        |
| K7GM40                      | Apolipoprotein A1                         | cholesterol transfer activity                | adrenal gland development                       | APOA1     | 0.031   | 2.08        |
| F1RPX3                      | Secretoglobin family 1A member 1          | -                                            | signal transduction                             | SCGB1A1   | 0.042   | 1.97        |
| F1RXM6                      | Serpin family A member 7                  | serine-type endopeptidase inhibitor activity | negative regulation of endopeptidase activity   | SERPINA7  | 0.018   | 1.83        |
| A0A287AEV6                  | Uncharacterized protein                   | -                                            | positive regulation of neutrophil extravasation | CD99      | 0.015   | 1.83        |
| A0A287AP28                  | Ig-like domain-containing protein         | -                                            | Glycoprotein                                    | IGHV3-23  | 0.035   | 1.80        |
| A0A5G2R113                  | Uncharacterized protein                   | dermokine                                    | cornified envelope assembly                     | DMKN      | 0.026   | 1.73        |
| I3L8B2                      | Uncharacterized protein                   | extracellular matrix structural constituent  | extracellular matrix organization               | COL9A2    | 0.040   | 1.70        |

|            |                                                                   |                                                 |                                                                                      |              |       |       |
|------------|-------------------------------------------------------------------|-------------------------------------------------|--------------------------------------------------------------------------------------|--------------|-------|-------|
| A0A287APK0 | 6-phosphogluconolactonase<br>(Pentose phosphate pathway)          | 6-phosphogluconolactonase<br>activity           | carbohydrate metabolic<br>process                                                    | PGLS         | 0.050 | 1.61  |
| P24853     | Insulin like growth factor binding<br>protein 2                   | insulin-like growth factor I<br>binding         | regulation of growth                                                                 | IGFBP2       | 0.015 | 1.59  |
| A0A5G2QE21 | Uncharacterized protein                                           | Serine peptidase inhibitor<br>Kazal type 5      | -                                                                                    | SPINK5       | 0.032 | 1.47  |
| F1S6S9     | Peptidase S1 domain-containing<br>protein                         | Serine-type endopeptidase<br>activity           | negative regulation of<br>phagocytosis                                               | PRTN3        | 0.002 | 1.44  |
| A0A5G2R4W0 | LAM_G_DOMAIN domain-<br>containing protein                        | Collagen type XVIII alpha 1<br>chain            | -                                                                                    | COL18A1      | 0.038 | 1.37  |
| A0A5G2QYD1 | Aggrecan core protein                                             | Hyaluronic acid binding                         | cell adhesion                                                                        | ACAN         | 0.047 | 1.37  |
| A0A287ASA4 | Aa_trans domain-containing<br>protein                             | Solute carrier family 38<br>member 10           | -                                                                                    | SLC38A10     | 0.021 | 1.36  |
| F1SFA7     | Fibrillar collagen NC1 domain-<br>containing protein              | Platelet-derived growth factor<br>binding       | bone mineralization                                                                  | COL1A2       | 0.033 | -1.33 |
| A0A2C9F3F9 | Insulin like growth factor 1                                      | growth factor activity                          | -                                                                                    | IGF1         | 0.017 | -1.35 |
| F1SM61     | Fibulin 1                                                         | peptidase activator activity                    | extracellular matrix<br>organization                                                 | FBLN1        | 0.043 | -1.49 |
| A0A5G2QJN1 | LFNG O-fucosylpeptide 3-beta-<br>N-Acetylglucosaminyltransferase. | metal ion binding                               | pattern specification<br>process                                                     | LFNG         | 0.020 | -1.62 |
| F1RM86     | Uncharacterized protein                                           | Metalloendopeptidase activity                   | -                                                                                    | ADAMDEC1     | 0.030 | -1.72 |
| A0A287A391 | Eukaryotic translation elongation<br>factor 1 alpha 1             | GTPase activity                                 | -                                                                                    | EEF1A1       | 0.013 | -2.00 |
| A6P7L6     | Calcitonin-related polypeptide<br>beta                            | calcitonin receptor binding                     | regulation of cytosolic<br>calcium ion concentration                                 | CALCB        | 0.027 | -2.42 |
| I3L5L0     | Uncharacterized protein                                           | TRAIL binding                                   | signal transduction                                                                  | LOC100737977 | 0.037 | -2.44 |
| F1SCF1     | SERPIN domain-containing<br>protein                               | Serine-type endopeptidase<br>inhibitor activity | negative regulation of<br>endopeptidase activity                                     | SERPINA6     | 0.029 | -2.71 |
| P00355     | Glyceraldehyde-3-phosphate<br>dehydrogenase (GAPDH)               | peptidyl-cysteine S-nitrosylase<br>activity     | glucose metabolic process                                                            | GAPDH        | 0.022 | -3.02 |
| P68137     | ATP binding (Actin)                                               |                                                 |                                                                                      | ACTA1        | 0.001 | -3.13 |
| A0A287AAU1 | Cellular communication network<br>factor 3                        | insulin-like growth factor<br>binding           | -                                                                                    | CCN3         | 0.017 | -3.19 |
| F1RVS9     | SCP domain-containing protein                                     | Peptidase inhibitor 16                          | negative regulation of cell<br>growth involved in cardiac<br>muscle cell development | PI16         | 0.001 | -3.60 |

|                              |                                            |                                            |                                         |         |       |        |
|------------------------------|--------------------------------------------|--------------------------------------------|-----------------------------------------|---------|-------|--------|
| A0A287BEI1                   | Keratin 77                                 | -                                          | -                                       | KRT77   | 0.005 | -4.38  |
| F1RFS7                       | Matrix metalloproteinase 15                | Cofactor for Ca and Zn                     | metalloendopeptidase activity           | MMP15   | 0.032 | -4.73  |
| F1S8P9                       | Aldolase_II domain-containing protein      | -                                          | -                                       | ADD1    | 0.042 | -4.86  |
| A0A5G2R4A8                   | Heterogeneous nuclear ribonucleoprotein A3 | RNA binding                                | -                                       | HNRNPA3 | 0.043 | -5.18  |
| A0A287ASI0                   | Keratin 7                                  | -                                          | -                                       | KRT7    | 0.029 | -5.55  |
| A0A287A6F0                   | Uncharacterized protein                    | calcium ion binding                        | -                                       | MYLPF   | 0.022 | -10.86 |
| Q9TV62                       | Myosin, heavy chain 2, skeletal muscle     | actin filament binding                     | muscle contraction                      | MYH4    | 0.000 | -14.40 |
| <b>LD vs. NC<sup>1</sup></b> |                                            |                                            |                                         |         |       |        |
| I3LJP2                       | Selenoprotein P                            | selenium binding                           | regulation of growth                    | SELENOP | 0.033 | 5.21   |
| A0A5G2QPS7                   | Aldolase_II domain-containing protein      | -                                          | -                                       | ADD2    | 0.050 | 4.33   |
| A0A287BLH9                   | Uncharacterized protein                    | immunoglobulin production                  | -                                       | IGLV3-1 | 0.022 | 3.63   |
| A0A286ZTG2                   | Uncharacterized protein                    | metal ion binding                          | - Muscleblind like splicing regulator 1 | MBNL1   | 0.015 | 2.32   |
| F2Z5F7                       | Protein dpy-30 homolog isoform 1           | protein homodimerization activity          | endosomal transport                     | DPY30   | 0.026 | 2.29   |
| A0A287B7U0                   | Ribosomal protein lateral stalk subunit P2 | structural constituent of ribosome         | translational elongation                | RPLP2   | 0.022 | 2.23   |
| F1S021                       | Collagen type V alpha 1 chain              | platelet-derived growth factor binding     | blood vessel development                | COL5A1  | 0.024 | 1.83   |
| A0A5G2QJN1                   | Beta-1,3-N-acetylglucosaminyltransferase   | metal ion binding                          | pattern specification process           | LFNG    | 0.007 | 1.66   |
| A0A286ZL45                   | Dedicator of cytokinesis 2                 | guanyl-nucleotide exchange factor activity | actin cytoskeleton organization         | DOCK2   | 0.048 | 1.41   |
| A0A287ARV5                   | Ubiquitin related modifier 1               | sulfur carrier                             | protein urmylation                      | URM1    | 0.024 | 1.34   |
| A0A287AMT2                   | Uncharacterized protein                    | Laminin subunit beta 2                     | -                                       | LAMB2   | 0.043 | -1.33  |
| Q9GKQ6                       | Biglycan                                   | collagen fiber assembly                    | -                                       | BGN     | 0.005 | -1.49  |
| F1RX36                       | Fibrinogen alpha chain                     | signaling receptor binding                 | plasminogen activation                  | FGA     | 0.037 | -1.60  |

|                              |                                              |                                                                  |                                                                      |              |       |       |
|------------------------------|----------------------------------------------|------------------------------------------------------------------|----------------------------------------------------------------------|--------------|-------|-------|
| A0A287BGE8                   | Uncharacterized protein                      | -                                                                | -                                                                    | GRN          | 0.038 | -1.65 |
| F1RJ72                       | BRICHOS domain-containing protein            | -                                                                | endothelial cell morphogenesis                                       | CNMD         | 0.045 | -1.66 |
| E9KYT3                       | Insulin like growth factor binding protein 4 | insulin-like growth factor I binding                             | Either inhibit or stimulate the growth promoting effects of the IGFs | IGFBP4       | 0.039 | -1.70 |
| F1SCD0                       | SERPIN domain-containing protein             | -                                                                | -                                                                    | SERPINA3-2   | 0.017 | -1.81 |
| P06867                       | Plasminogen                                  | serine-type endopeptidase activity                               | blood coagulation                                                    | PLG          | 0.035 | -2.00 |
| A0A5G2QWT2                   | Ig-like domain-containing protein            | Glycoprotein                                                     | -                                                                    | IGLV3-21     | 0.002 | -2.06 |
| A0A286ZYQ7                   | Ig-like domain-containing protein            | Glycoprotein                                                     | -                                                                    | IGKV2D-28    | 0.006 | -2.80 |
| A0A287ADT3                   | BCL2 like 15                                 | -                                                                | regulation of apoptotic process                                      | BCL2L15      | 0.041 | -2.80 |
| Q95JC8                       | Arginase 1, Catalytic activity               | -                                                                | Involved in urea cycle                                               | ARG1         | 0.048 | -3.31 |
| F1SCC7                       | SERPIN domain-containing protein             | serine-type endopeptidase inhibitor activity                     | negative regulation of endopeptidase activity                        | LOC396684    | 0.004 | -5.39 |
| <b>HD vs. NC<sup>1</sup></b> |                                              |                                                                  |                                                                      |              |       |       |
| Q9TV62                       | Myosin, heavy chain 2, skeletal muscle       | actin filament binding                                           | muscle contraction                                                   | MYH1         | 0.004 | 20.38 |
| F1SQ51                       | Uncharacterized protein                      | Basic proline-rich protein                                       | -                                                                    | TP23         | 0.015 | 17.30 |
| A0A287B409                   | Uncharacterized protein                      | proton transmembrane transporter activity                        | transmembrane transport                                              | IGKV2D-29    | 0.017 | 7.15  |
| A0A287BEI1                   | IF rod domain-containing protein             | -                                                                | -                                                                    | KRT77        | 0.017 | 4.46  |
| A0A5G2RFC8                   | Uncharacterized protein                      | -                                                                | -                                                                    | UMAD1        | 0.043 | 3.83  |
| F1RFS7                       | ZnMc domain-containing protein               | zinc ion binding                                                 | -                                                                    | MMP15        | 0.030 | 3.51  |
| A0A5G2QW63                   | Uncharacterized protein                      | -                                                                | -                                                                    | CCDC117      | 0.046 | 2.61  |
| F1SR80                       | Tubulin alpha chain                          | GTPase activity                                                  | microtubule-based process                                            | LOC100158003 | 0.043 | 2.01  |
| A0A5G2RGV2                   | Integral membrane protein 2B                 | -                                                                | -                                                                    | ITM2B        | 0.013 | 1.94  |
| A0A5G2QJN1                   | Beta-1,3-N-acetylglucosaminyltransferase     | O-fucosylpeptide 3-beta-N-acetylglucosaminyltransferase activity | pattern specification process                                        | LFNG         | 0.036 | 1.87  |
| A0A286ZL45                   | Uncharacterized protein                      | guanyl-nucleotide exchange factor activity                       | actin cytoskeleton organization                                      | DOCK2        | 0.013 | 1.74  |

|                               |                                                |                                          |                                                                     |              |       |       |
|-------------------------------|------------------------------------------------|------------------------------------------|---------------------------------------------------------------------|--------------|-------|-------|
| P16611                        | Insulin-like growth factor-binding protein 3   | fibronectin binding                      | regulation of insulin-like growth factor receptor signaling pathway | IGFBP3       | 0.038 | 1.65  |
| F1RM86                        | ADAM like decysin 1                            | metalloendopeptidase activity            | -                                                                   | ADAMDEC1     | 0.041 | 1.55  |
| P01165                        | Neuroendocrine protein 7B2                     | unfolded protein binding                 | regulation of hormone secretion                                     | SCG5         | 0.013 | 1.14  |
| A0A287BGE8                    | Uncharacterized protein                        | -                                        | -                                                                   | GRN          | 0.026 | -1.31 |
| I3L5L0                        | Uncharacterized protein                        | TRAIL binding                            | signal transduction                                                 | LOC100624226 | 0.045 | -1.63 |
| I3LN42                        | Gc-globulin                                    | caldiol binding                          | vitamin D metabolic process                                         | GC           | 0.017 | -1.88 |
| A0A287ALJ6                    | Ig-like domain-containing protein              | immune response                          | -                                                                   | IGKV2D-29    | 0.029 | -2.12 |
| F1SEC5                        | Cell growth regulator with EF-hand domain 1    | calcium ion binding                      | -                                                                   | CGREF1       | 0.003 | -2.31 |
| I3LS87                        | Transforming growth factor beta binding        | transforming growth factor beta binding  | cellular response to redox state                                    | VASN         | 0.009 | -2.49 |
| A0A5G2QE94                    | Immunoglobulin superfamily containing leucine  | -                                        | -                                                                   | ISLR         | 0.008 | -2.61 |
| A0A287B5C1                    | Uncharacterized protein                        | -                                        | -                                                                   | IGHM         | 0.008 | -2.62 |
| A0A287A0Y1                    | Uncharacterized protein                        | -                                        | -                                                                   | PFDN5        | 0.005 | -4.40 |
| A0A5G2RLN3                    | Calcium voltage-gated channel subunit alpha1 E | calcium ion binding                      | regulation of ion transmembrane transport                           | CACNA1E      | 0.036 | -19.7 |
| <b>LDR vs. LD<sup>1</sup></b> |                                                |                                          |                                                                     |              |       |       |
| I3LDS2                        | TMF1 regulated nuclear protein 1               | DNA binding                              | regulation of cell cycle                                            | TRNP1        | 0.014 | 11.68 |
| A0A287ADT3                    | BCL2 like 15                                   | regulation of apoptotic process          | -                                                                   | BCL2L15      | 0.022 | 6.43  |
| Q95JC8                        | Arginase 1                                     | Catalytic activity                       | involved in urea cycle                                              | ARG1         | 0.028 | 6.11  |
| I3LGN8                        | Plakophilin 1                                  | cadherin binding                         | cell-cell junction assembly                                         | PKP1         | 0.009 | 5.18  |
| A0A287BHY5                    | keratin 2                                      | cytoskeletal protein binding             | intermediate filament organization                                  | KRT2         | 0.024 | 5.02  |
| I3LDS3                        | IF rod domain-containing protein               | structural constituent of skin epidermis | peptide cross-linking                                               | KRT10        | 0.016 | 4.91  |
| A0A5G2QSE8                    | keratin 3, IF rod domain-containing protein    | -                                        | -                                                                   | KRT3         | 0.026 | 4.42  |
| F1SE02                        | Uncharacterized protein                        | -                                        | -                                                                   | CEP128       | 0.014 | 4.31  |
| A0A287B8U7                    | Plexin domain containing 2                     | -                                        | -                                                                   | PLXDC2       | 0.046 | 3.22  |
| A0A5G2RCI8                    | Coagulation factor XII                         | serine-type endopeptidase activity       | -                                                                   | F12          | 0.021 | 2.25  |
| F1SHM0                        | Pyruvate kinase, muscle                        | pyruvate kinase activity                 | -                                                                   | PKM          | 0.024 | 2.22  |

|                               |                                                       |                                              |                                               |           |       |       |
|-------------------------------|-------------------------------------------------------|----------------------------------------------|-----------------------------------------------|-----------|-------|-------|
| A0A286ZX29                    | serpin family B member 12                             | serine-type endopeptidase inhibitor activity | hematopoietic progenitor cell differentiation | SERPINB12 | 0.041 | 2.01  |
| A0A287A1U5                    | Heat shock protein family E                           | ATP binding                                  | protein folding                               | HSPE1     | 0.005 | 1.52  |
| Q9GKQ6                        | Biglycan                                              | Involved in collagen fiber assembly          |                                               | BGN       | 0.025 | 1.40  |
| I3LM99                        | Grancalcin                                            | calcium ion binding                          | -                                             | GCA       | 0.044 | -1.41 |
| P04119                        | Beta-lactoglobulin-1A/1C                              | retinol binding                              | -                                             | LCN15     | 0.049 | -1.50 |
| A0A286ZTG2                    | Uncharacterized protein                               | Muscle blind like splicing regulator 1       | -                                             | MBNL1     | 0.005 | -1.53 |
| A0A287BRL8                    | Myristoylated alanine rich protein kinase C substrate | actin filament binding                       | actin filament bundle assembly                | MARCKS    | 0.028 | -1.79 |
| I3LHP2                        | Acyl-protein thioesterase 2 isoform X3                | lysophospholipase activity                   | protein depalmitoylation                      | LYPLA2    | 0.043 | -1.83 |
| A0A287B7U0                    | Ribosomal protein lateral stalk subunit P2            | structural constituent of ribosome           | translational elongation                      | RPLP2     | 0.024 | -1.88 |
| F1S862                        | Sulfiredoxin 1                                        | sulfiredoxin activity                        | cellular response to oxidative stress         | SRXN1     | 0.033 | -2.02 |
| I3LK29                        | Phosphatidylcholine-sterol acyltransferase            | apolipoprotein A-I binding                   | cholesterol metabolic process                 | LCAT      | 0.018 | -2.11 |
| I3LEC2                        | Uncharacterized protein                               | mRNA binding                                 | regulation of gene expression                 | PCBP1     | 0.021 | -2.14 |
| A0A5G2Q8S2                    | Peroxidasin                                           | heme binding                                 | response to oxidative stress                  | PXDN      | 0.014 | -2.35 |
| P21753                        | Thymosin beta-10                                      | actin monomer binding                        | regulation of cell migration                  | TMSB10    | 0.013 | -2.99 |
| A0A287AAU1                    | Uncharacterized protein                               | insulin-like growth factor binding           | -                                             | CCN3      | 0.000 | -3.19 |
| <b>HDR vs. HD<sup>1</sup></b> |                                                       |                                              |                                               |           |       |       |
| A0A5G2QXT5                    | Uncharacterized protein                               | -                                            | -                                             | IGHG4     | 0.020 | 2.36  |
| F1SLW6                        | Uncharacterized protein                               | -                                            | -                                             | MFAP5     | 0.048 | 2.16  |
| A0A287BRL8                    | Myristoylated alanine rich protein kinase C substrate | kinase activity                              | actin crosslink formation                     | MARCKS    | 0.037 | 1.56  |
| A0A287BAK1                    | Talin 1                                               | actin filament binding                       | cell adhesion                                 | TLN1      | 0.049 | -1.58 |
| Q95274                        | Thymosin beta 4 X-linked                              | actin monomer binding                        | regulation of cell migration                  | TMSB4     | 0.004 | -1.64 |
| A0A287ACX2                    | Uncharacterized protein                               | centrosome localization                      | -                                             | NIN       | 0.043 | -1.66 |
| A0A5G2R7T5                    | Uncharacterized protein                               | -                                            | -                                             | TMEM40    | 0.041 | -1.80 |
| P04574                        | Calpain small subunit 1                               | calcium ion binding                          | proteolysis                                   | CAPNS1    | 0.021 | -1.99 |
| Q29290                        | Cystatin B                                            | protease binding                             | adult locomotory behavior                     | CSTB      | 0.016 | -1.99 |

|            |                                                   |                                        |                                                     |              |       |       |
|------------|---------------------------------------------------|----------------------------------------|-----------------------------------------------------|--------------|-------|-------|
| A0A287ALA0 | Brain abundant membrane attached signal protein 1 | protein domain specific binding        | glomerular visceral epithelial cell differentiation | BASP1        | 0.041 | -2.15 |
| P21753     | Thymosin beta-10 (regulation of cell migration)   | actin monomer binding                  | regulation of cell migration                        | TMSB10       | 0.014 | -2.53 |
| M3VJZ7     | LIM and SH3 protein 1                             | actin filament binding                 | -                                                   | LASP1        | 0.000 | -2.55 |
| A0A5G2QRL2 | PDZ domain-containing protein                     | -                                      | -                                                   | PDLIM1       | 0.013 | -2.62 |
| K7GLE1     | Annexin A1                                        | phospholipase inhibitor activity       | -                                                   | ANXA1        | 0.029 | -2.71 |
| F1RLQ3     | Semaphorin 4A                                     | semaphorin receptor binding            | -                                                   | SEMA4A       | 0.027 | -2.72 |
| A0A287AKM8 | Corneodesmosin                                    | Protein homodimerization activity      | skin morphogenesis                                  | CDSN         | 0.047 | -2.78 |
| A0A287BEC7 | Vesicle associated membrane protein 3             | SNAP receptor activity                 | vesicle fusion                                      | VAMP3        | 0.029 | -3.10 |
| A0A480PPD4 | Eukaryotic translation initiation factor 4H       | translation initiation factor activity | -                                                   | EIF4H        | 0.014 | -3.33 |
| A0A5G2QR43 | Uncharacterized protein                           | -                                      | -                                                   | GOLGB1       | 0.045 | -3.39 |
| P81693     | Uncharacterized protein                           | -                                      | -                                                   | ACP1         | 0.037 | -3.77 |
| A0A287BQI8 | keratin, type II cytoskeletal 3-like              | -                                      | -                                                   | LOC100155249 | 0.030 | -4.23 |
| M3UZ42     | IF rod domain-containing protein                  | brain development                      | Negative regulation of protein import into nucleus  | UFM1         | 0.049 | -7.38 |
| A0A287B409 | Uncharacterized protein                           | -                                      | -                                                   | ATP6V0E1     | 0.004 | -7.60 |

<sup>1</sup>PC (positive control): normal protein, adequate calcium (Ca) and available phosphorous (aP), no corn-expressed phytase (CEP) added; NC (negative control): low protein, adequate Ca and aP, no CEP added; LD: NC + CEP added at low dose, i.e. 2,000 one phytase unit (FTU)/kg of diet; HD: NC + CEP added at high dose, i.e. 4,000 FTU/kg of diet; LDR: LD with reduced Ca and P; HDR: HD with reduced Ca and P. n = 8 for each dietary group

<sup>(-)</sup> not available in sus scrofa (pig) database (<https://www.uniprot.org/>)

## Supplementary Figures

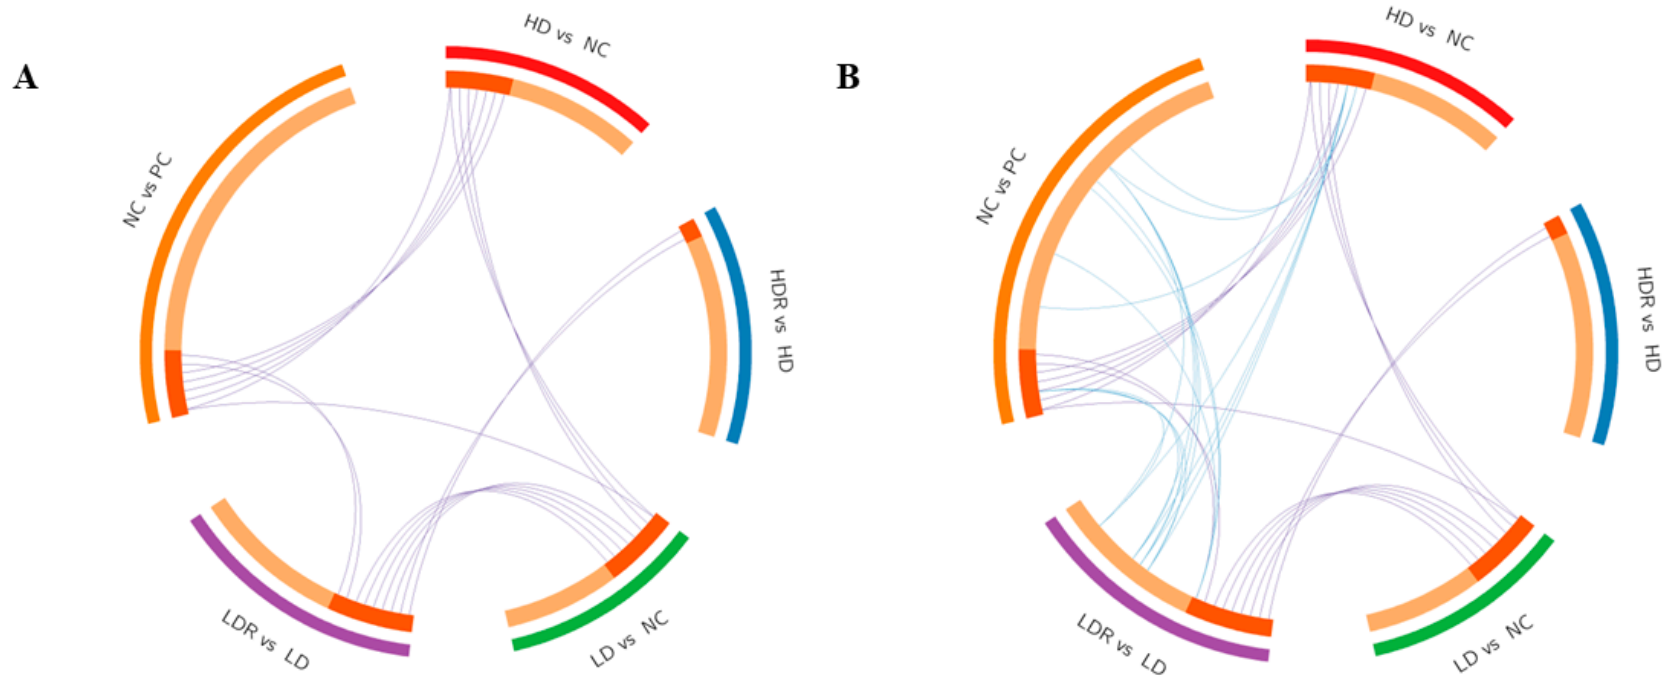

**Figure S1.** Overlap between gene lists: (A) at the gene level, where purple curves link identical genes; (B) including the shared term level, where blue curves link genes that belong to the same enriched ontology term. The inner circle represents gene lists, where hits are arranged along the arc. Genes that hit multiple lists are colored in dark orange, and genes unique to a list are shown in light orange. The greater the number of purple links and the longer the dark orange arcs imply greater overlap among the input gene lists. Blue links indicate the amount of functional overlap among the input gene lists. PC (positive control): normal protein, adequate calcium (Ca) and available phosphorous (aP), no corn-expressed phytase (CEP) added; NC (negative control): low protein, adequate Ca and aP, no CEP added; LD: NC + CEP added at low dose, *i.e.* 2,000 one phytase unit (FTU)/kg of diet; HD: NC + CEP added at high dose, *i.e.* 4,000 FTU/kg of diet; LDR: LD with reduced Ca and P; HDR: HD with reduced Ca and P.  $n = 7-8$  for each dietary group.



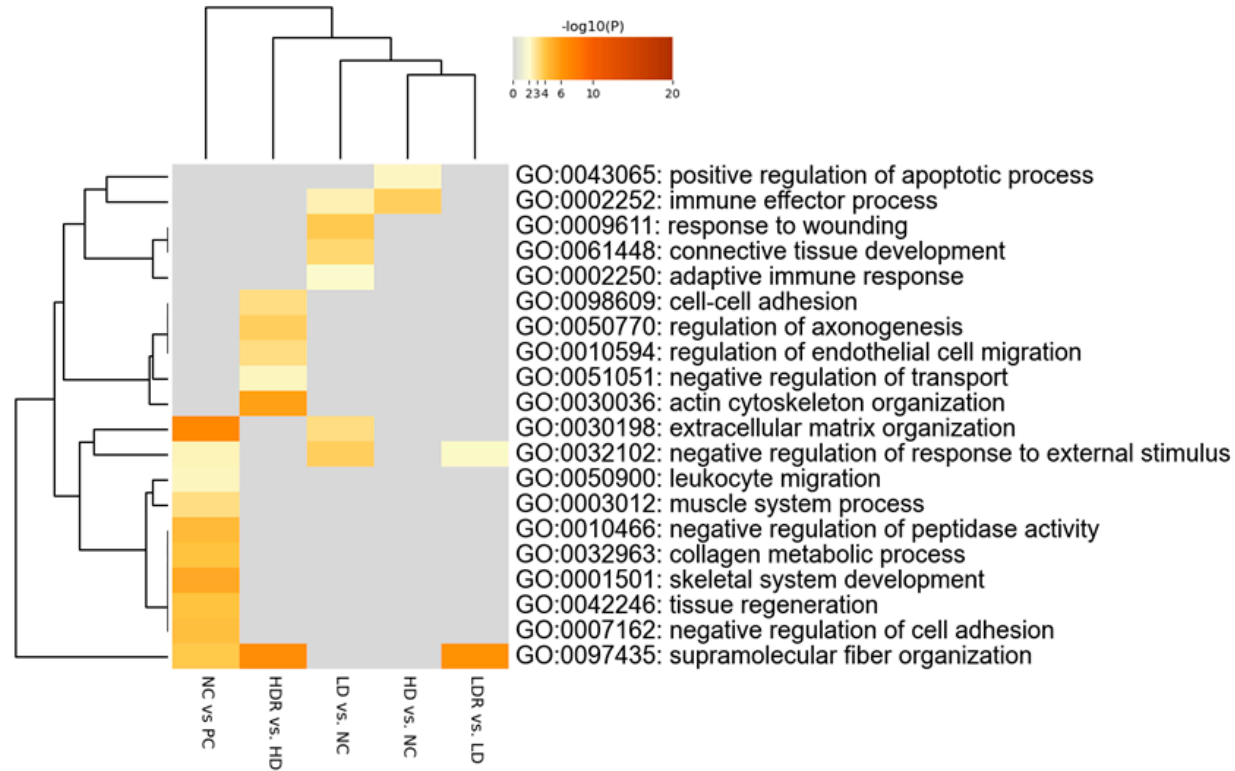

**Figure S2.** Overall biological processes enrichment analysis in Metascape. Significant terms are hierarchically clustered into a tree based on Kappa-statistical similarities among their gene memberships and a 0.3 kappa score was applied as the threshold to cast the tree into term clusters. Go term with the best P-value within each cluster was selected as its representative term and display them in a dendrogram. The heatmap cells are colored by their p-values, white cells indicate the lack of enrichment for that term in the corresponding gene list. PC (positive control): normal protein, adequate calcium (Ca) and available phosphorous (aP), no corn-expressed phytase (CEP) added; NC (negative control): low protein, adequate Ca and aP, no CEP added; LD: NC + CEP added at low dose, i.e. 2,000 one phytase unit (FTU)/kg of diet; HD: NC + CEP added at high dose, i.e. 4,000 FTU/kg of diet; LDR: LD with reduced Ca and P; HDR: HD with reduced Ca and P. n = 7-8 for each dietary group.

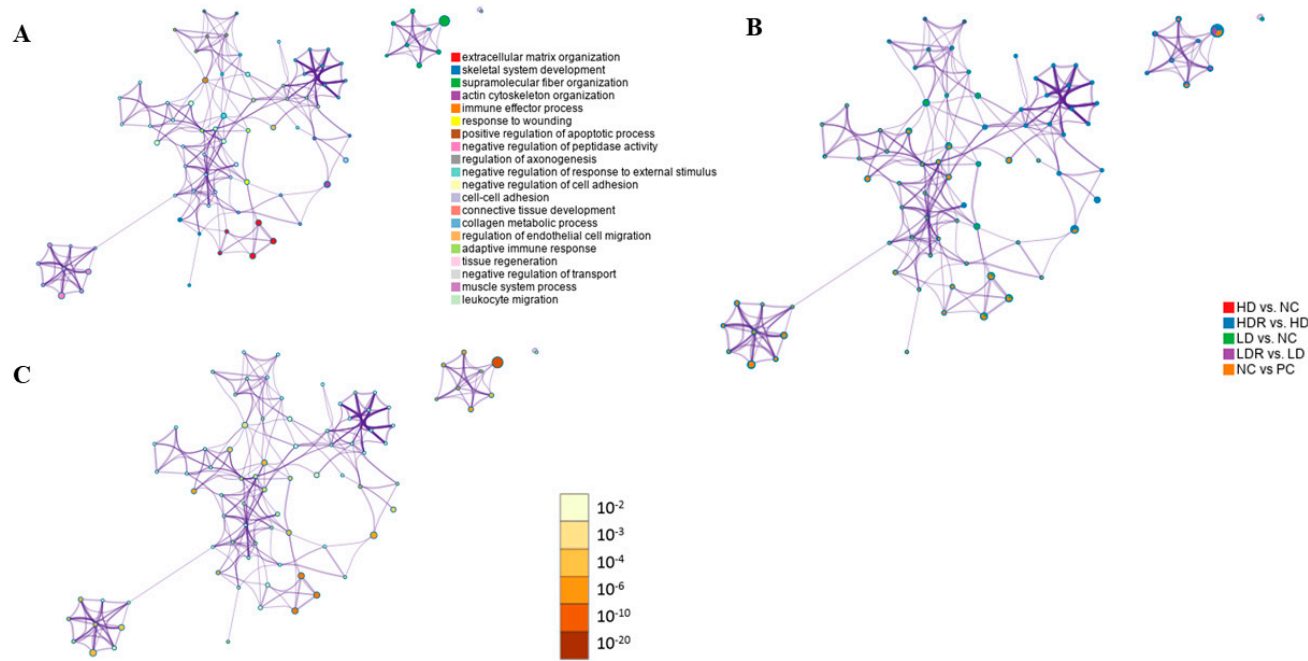

**Figure S3.** The selected subset of representative GO biological processes/terms from the full cluster were converted into a network layout. Terms with a similarity score  $> 0.3$  are linked by an edge (the thickness of the edge represents the similarity score). One term from each cluster is selected to have its term description shown as label. (A) Enrichment network with nodes colored based on Go biological processes, (B) Enrichment network with nodes colored based on treatment groups, (C) Enrichment network with nodes colored by P-value. The darker the color the more the enrichment. PC (positive control): normal protein, adequate calcium (Ca) and available phosphorous (aP), no corn-expressed phytase (CEP) added; NC (negative control): low protein, adequate Ca and aP, no CEP added; LD: NC + CEP added at low dose, *i.e.* 2,000 one phytase unit (FTU)/kg of diet; HD: NC + CEP added at high dose, *i.e.* 4,000 FTU/kg of diet; LDR: LD with reduced Ca and P; HDR: HD with reduced Ca and P.  $n = 7-8$  for each dietary group.

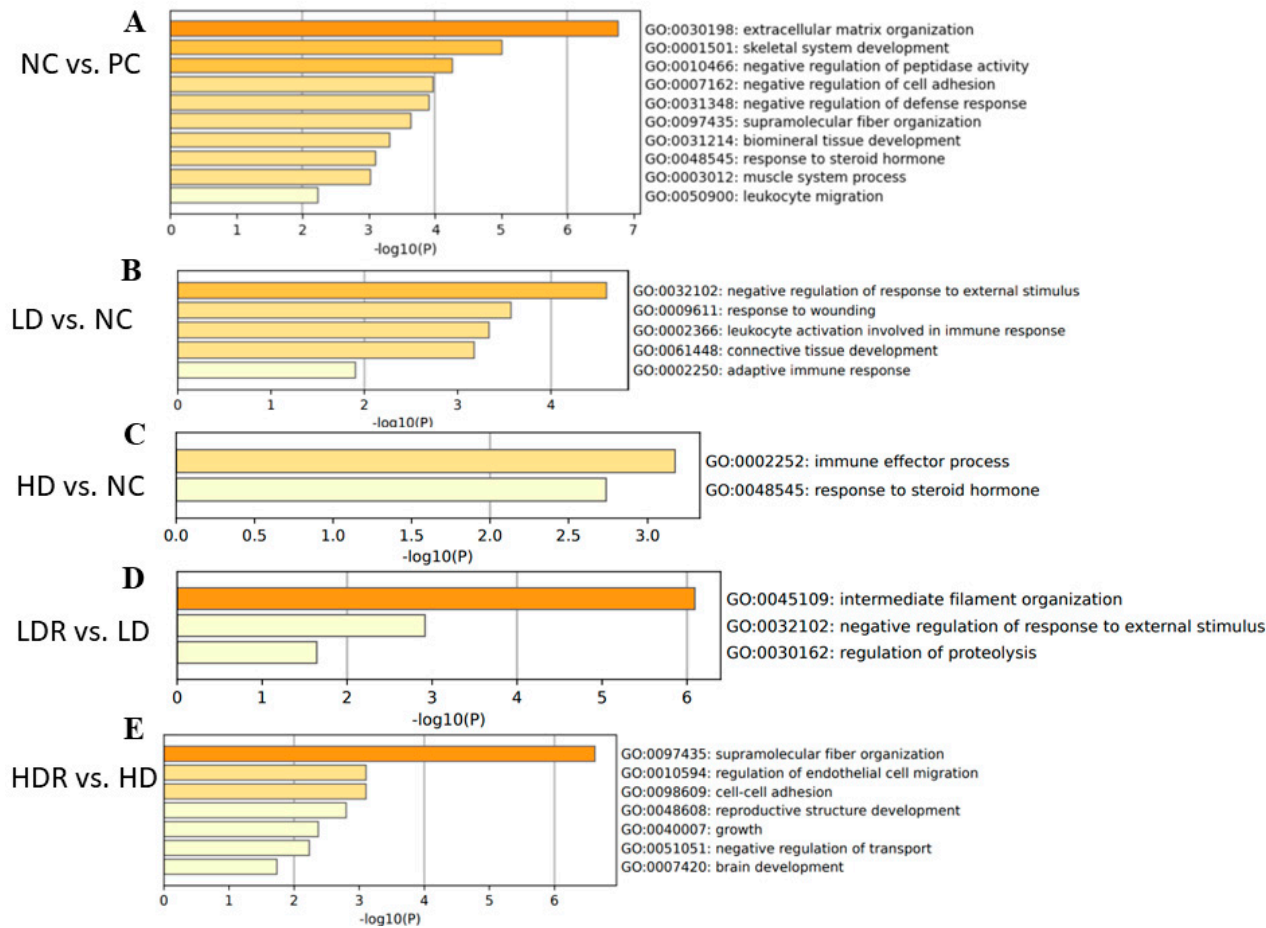

**Figure S4.** Gene enrichment GO analysis of differentially expressed proteins in serum of nursery pigs fed with low protein diets with or without reduced calcium and phosphorous supplemented with a corn-expressed phytase. PC (positive control): normal protein, adequate calcium (Ca) and available phosphorous (aP), no corn-expressed phytase (CEP) added; NC (negative control): low protein, adequate Ca and aP, no CEP added; LD: NC + CEP added at low dose, *i.e.* 2,000 one phytase unit (FTU)/kg of diet; HD: NC + CEP added at high dose, *i.e.* 4,000 FTU/kg of diet; LDR: LD with reduced Ca and P; HDR: HD with reduced Ca and P. n = 7-8 for each dietary group.
